# Supplementary material
Source: PubMed Central journal article supplement (PMC5182149)
Supplement: NIHMS817134-supplement-01.pdf [file NIHMS817134-supplement-01.pdf]

**Table 1a: Description of baseline characteristics by HIV serostatus**

| Baseline covariates                         | Overall |       | HIV-negative |       | HIV-positive |       |
|---------------------------------------------|---------|-------|--------------|-------|--------------|-------|
|                                             | n       | %     | n            | %     | n            | %     |
| Race/ethnicity                              |         |       |              |       |              |       |
| African American/Black                      | 1299    | 53.81 | 344          | 51.81 | 955          | 54.57 |
| White                                       | 370     | 15.33 | 99           | 14.91 | 271          | 15.49 |
| Hispanic                                    | 651     | 26.97 | 193          | 29.07 | 458          | 26.17 |
| Other                                       | 94      | 3.89  | 28           | 4.22  | 66           | 3.77  |
| Income, annual                              |         |       |              |       |              |       |
| ≤\$6,000                                    | 636     | 27.31 | 192          | 30.00 | 444          | 26.29 |
| \$6001-12,000                               | 669     | 28.72 | 170          | 26.56 | 499          | 29.54 |
| \$12,001-24,000                             | 507     | 21.77 | 129          | 20.16 | 378          | 22.38 |
| >\$24,000                                   | 517     | 22.2  | 149          | 23.28 | 368          | 21.79 |
| Marital status                              |         |       |              |       |              |       |
| Married                                     | 521     | 21.62 | 126          | 18.98 | 395          | 22.62 |
| Not married but living with partner         | 372     | 15.44 | 95           | 14.31 | 277          | 15.86 |
| Single, widowed, divorced, separated, other | 1517    | 62.95 | 443          | 66.72 | 1074         | 61.51 |
| Education completed                         |         |       |              |       |              |       |
| Grade 11 or less                            | 880     | 36.51 | 231          | 35.00 | 649          | 37.09 |
| High school or greater                      | 1530    | 63.49 | 429          | 65.00 | 1101         | 62.91 |
| Employment status                           |         |       |              |       |              |       |
| Employed                                    | 1683    | 69.81 | 428          | 64.46 | 1255         | 71.84 |
| Unemployed                                  | 728     | 30.19 | 236          | 35.54 | 492          | 28.16 |
| Insurance status                            |         |       |              |       |              |       |
| Insured                                     | 1835    | 76.71 | 398          | 60.49 | 1437         | 82.87 |
| Uninsured                                   | 557     | 23.29 | 260          | 39.51 | 297          | 17.13 |
| WIHS Site                                   |         |       |              |       |              |       |
| Bronx                                       | 475     | 19.68 | 148          | 22.29 | 327          | 18.69 |
| Brooklyn                                    | 464     | 19.22 | 122          | 18.37 | 342          | 19.54 |
| Washington, D.C.                            | 355     | 14.71 | 95           | 14.31 | 260          | 14.86 |
| Los Angeles                                 | 474     | 19.64 | 132          | 19.88 | 342          | 19.54 |
| San Francisco                               | 354     | 14.66 | 108          | 16.27 | 246          | 14.06 |
| Chicago                                     | 292     | 12.1  | 59           | 8.89  | 233          | 13.31 |
| Number of lifetime male sex partners        |         |       |              |       |              |       |
| 0-4                                         | 557     | 23.48 | 139          | 21.12 | 418          | 24.39 |
| 5-9                                         | 529     | 22.3  | 154          | 23.40 | 375          | 21.88 |
| 10-24                                       | 559     | 23.57 | 168          | 25.53 | 391          | 22.81 |
| ≥25                                         | 727     | 30.65 | 197          | 29.94 | 530          | 30.92 |
| Parity                                      |         |       |              |       |              |       |
| None                                        | 364     | 17.68 | 103          | 19.73 | 261          | 16.98 |
| 1-2                                         | 1082    | 52.55 | 268          | 51.34 | 814          | 52.96 |
| ≥3                                          | 613     | 29.77 | 151          | 28.93 | 462          | 30.06 |
| Prior abortion at baseline                  |         |       |              |       |              |       |
| Yes                                         | 1162    | 56.44 | 316          | 60.54 | 846          | 55.04 |
| No                                          | 897     | 43.56 | 206          | 39.46 | 691          | 44.96 |
| Previous STI                                |         |       |              |       |              |       |
| Yes                                         | 1570    | 65.58 | 364          | 55.07 | 1206         | 69.59 |
| No                                          | 824     | 34.42 | 297          | 44.93 | 527          | 30.41 |

| Year of first cART |     |       |
|--------------------|-----|-------|
| 1995-1999          | 905 | 62.24 |
| 2000-2003          | 315 | 21.66 |
| 2004-2008          | 136 | 9.35  |
| 2009-2012          | 98  | 6.74  |

WIHS=Women's interagency HIV Study; STI=Sexually transmitted infection, cART=combined antiretroviral therapy

**Table 1b: Description of time-varying covariate characteristics by serostatus**

| Time-varying covariates                                   | Overall |       | HIV-negative |       | HIV-positive |       |
|-----------------------------------------------------------|---------|-------|--------------|-------|--------------|-------|
|                                                           | PY      | %     | PY           | %     | PY           | %     |
| Age*                                                      |         |       |              |       |              |       |
| <25                                                       | 2117    | 6.46  | 1233         | 12.20 | 884          | 3.90  |
| 25-29                                                     | 4707    | 14.36 | 2054         | 20.33 | 2653         | 11.70 |
| 30-34                                                     | 7683    | 23.44 | 2402         | 23.78 | 5281         | 23.29 |
| ≥35                                                       | 18267   | 55.74 | 4414         | 43.69 | 13853        | 61.10 |
| Year of study                                             |         |       |              |       |              |       |
| 1994-1997                                                 | 7409    | 22.61 | 1657         | 16.40 | 5752         | 25.37 |
| 1998-2001                                                 | 6551    | 19.99 | 1534         | 15.18 | 5017         | 22.13 |
| 2002-2005                                                 | 9372    | 28.6  | 3198         | 31.65 | 6174         | 27.23 |
| 2006-2012                                                 | 9442    | 28.81 | 3714         | 36.76 | 5728         | 25.27 |
| Contraception in last 6 months                            |         |       |              |       |              |       |
| LARC or hormonal user dependent                           | 4803    | 15.29 | 1849         | 19.48 | 2954         | 13.47 |
| None or other                                             | 26614   | 84.71 | 7642         | 80.52 | 18972        | 86.53 |
| Condom use in last 6 months                               |         |       |              |       |              |       |
| Yes                                                       | 19374   | 61.68 | 4926         | 51.91 | 14448        | 65.90 |
| No                                                        | 12039   | 38.32 | 4564         | 48.09 | 7475         | 34.10 |
| Currently smoking cigarettes                              |         |       |              |       |              |       |
| Yes                                                       | 14118   | 45.03 | 4453         | 46.97 | 9665         | 44.19 |
| No                                                        | 17232   | 54.97 | 5027         | 53.03 | 12205        | 55.81 |
| Alcohol use***                                            |         |       |              |       |              |       |
| 0-7 drinks/week                                           | 28260   | 90.48 | 8239         | 87.18 | 20021        | 91.92 |
| >7 drinks/week                                            | 2973    | 9.52  | 1212         | 12.82 | 1761         | 8.08  |
| Marijuana/hash use***                                     |         |       |              |       |              |       |
| Yes                                                       | 6431    | 20.52 | 2654         | 28.00 | 3777         | 17.27 |
| No                                                        | 24915   | 79.48 | 6825         | 72.00 | 18090        | 82.73 |
| Crack/cocaine/methamphetamines or intravenous drug use*** |         |       |              |       |              |       |
| Yes                                                       | 3367    | 10.74 | 1221         | 12.88 | 2146         | 9.82  |
| No                                                        | 27975   | 89.26 | 8257         | 87.12 | 19718        | 90.18 |
| Chronic medical conditions **                             |         |       |              |       |              |       |
| Yes                                                       | 9550    | 29.14 | 2651         | 26.24 | 6899         | 30.43 |
| No                                                        | 23224   | 70.86 | 7452         | 73.76 | 15772        | 69.57 |
| cART use***                                               |         |       |              |       |              |       |
| Yes                                                       |         |       |              |       | 10851        | 50.07 |
| No                                                        |         |       |              |       | 10822        | 49.93 |
| HIV viral load (log <sub>10</sub> copies/ml)              |         |       |              |       |              |       |
| <4                                                        |         |       |              |       | 14597        | 68.27 |
| ≥4                                                        |         |       |              |       | 6783         | 31.73 |
| CD4+ T-cell count (cells/mm <sup>3</sup> )                |         |       |              |       |              |       |
| <350                                                      |         |       |              |       | 8434         | 39.38 |
| ≥350                                                      |         |       |              |       | 12983        | 60.62 |

cART=combined antiretroviral therapy; PY=person-years

\* Age at pregnancy outcome or age at visit if no pregnancy outcome reported;

\*\*Includes stroke, MI, diabetes, hypertension, DVT PE, Cancer, TB.

\*\*\* Calculated as occurring since last visit

**Table 2. Unadjusted and age-adjusted pregnancy, live-birth and abortion rates by time period and HIV serostatus**

|                        | Unadjusted            |                   |                         | Direct Age Adjustment                |                  | p-value for age-adjusted rate difference for HIV+ and HIV-women ** |
|------------------------|-----------------------|-------------------|-------------------------|--------------------------------------|------------------|--------------------------------------------------------------------|
|                        | Number of pregnancies | Person-years (PY) | Pregnancy rate / 100 PY | Age-adjusted pregnancy rate / 100 PY | Estimated 95%CI* |                                                                    |
| <b>ALL PREGNANCIES</b> |                       |                   |                         |                                      |                  |                                                                    |
| <b>HIV-positive</b>    | 737                   | 11363.71          | 6.49                    | 11.31                                | 11.28, 11.34     | <0.0001                                                            |
| 1994-1997              | 176                   | 2730.32           | 6.45                    | 9.50                                 | 9.44, 9.60       | 0.0002                                                             |
| 1998-2001              | 144                   | 2658.33           | 5.42                    | 9.32                                 | 9.19, 9.53       | <0.0001                                                            |
| 2002-2005              | 245                   | 3142.30           | 7.80                    | 13.11                                | 13.04, 13.21     | 0.64058                                                            |
| 2006-2012              | 172                   | 2832.77           | 6.07                    | 16.59                                | 15.94, 17.46     | 0.23325                                                            |
| <b>HIV-negative</b>    | 619                   | 5306.06           | 11.67                   | 14.27                                | 14.24, 14.30     |                                                                    |
| 1994-1997              | 104                   | 821.17            | 12.66                   | 15.05                                | 14.92, 15.27     |                                                                    |
| 1998-2001              | 104                   | 858.13            | 12.12                   | 19.56                                | 19.28, 19.98     |                                                                    |
| 2002-2005              | 214                   | 1679.96           | 12.74                   | 13.69                                | 13.64, 13.78     |                                                                    |
| 2006-2012              | 197                   | 1946.80           | 10.12                   | 13.52                                | 13.41, 13.70     |                                                                    |
| <b>LIVE-BIRTH</b>      |                       |                   |                         |                                      |                  |                                                                    |
| <b>HIV-positive</b>    | 325                   | 11363.71          | 2.86                    | 4.85                                 | 4.83, 4.88       | 0.0399                                                             |
| 1994-1997              | 52                    | 2730.32           | 1.90                    | 2.85                                 | 2.81, 2.92       | 0.0034                                                             |
| 1998-2001              | 64                    | 2658.33           | 2.41                    | 4.02                                 | 3.94, 4.18       | 0.0395                                                             |
| 2002-2005              | 124                   | 3142.30           | 3.95                    | 6.52                                 | 6.48, 6.60       | 0.6276                                                             |
| 2006-2012              | 85                    | 2832.77           | 3.00                    | 7.27                                 | 6.88, 7.90       | 0.5075                                                             |
| <b>HIV-negative</b>    | 261                   | 5306.06           | 4.92                    | 5.90                                 | 5.89, 5.93       |                                                                    |
| 1994-1997              | 40                    | 821.17            | 4.87                    | 5.47                                 | 5.40, 5.64       |                                                                    |
| 1998-2001              | 35                    | 858.13            | 4.08                    | 7.06                                 | 6.89, 7.37       |                                                                    |
| 2002-2005              | 95                    | 1679.96           | 5.65                    | 6.08                                 | 6.05, 6.16       |                                                                    |
| 2006-2012              | 91                    | 1946.80           | 4.67                    | 6.07                                 | 6.00, 6.21       |                                                                    |
| <b>ABORTION</b>        |                       |                   |                         |                                      |                  |                                                                    |
| <b>HIV-positive</b>    | 231                   | 11363.71          | 2.03                    | 3.87                                 | 3.85, 3.90       | 0.0001                                                             |
| 1994-1997              | 76                    | 2730.32           | 2.78                    | 4.03                                 | 4.00, 4.11       | 0.0093                                                             |
| 1998-2001              | 43                    | 2658.33           | 1.62                    | 3.39                                 | 3.30, 3.56       | 0.0001                                                             |
| 2002-2005              | 66                    | 3142.30           | 2.10                    | 3.93                                 | 3.90, 4.01       | 0.1207                                                             |
| 2006-2012              | 46                    | 2832.77           | 1.62                    | 4.29                                 | 3.97, 4.85       | 0.5052                                                             |
| <b>HIV-negative</b>    | 238                   | 5306.06           | 4.49                    | 5.95                                 | 5.93, 5.98       |                                                                    |
| 1994-1997              | 43                    | 821.17            | 5.24                    | 6.83                                 | 6.74, 7.02       |                                                                    |
| 1998-2001              | 49                    | 858.13            | 5.71                    | 9.43                                 | 9.24, 9.77       |                                                                    |
| 2002-2005              | 79                    | 1679.96           | 4.70                    | 5.16                                 | 5.13, 5.24       |                                                                    |
| 2006-2012              | 67                    | 1946.80           | 3.44                    | 5.52                                 | 5.44, 5.66       |                                                                    |

PY=person year; CI=confidence interval; \* method by Tiwari, Clegg, and Zou (2006); \*\* method by Woolson and Bean (1982) for overall and for each time periods.

**Table 3a: Crude bivariable associations of baseline covariates with live-birth and abortion rates among HIV-negative and HIV-positive women**

|                                                 | HIV-negative |            |         |           |            |         | HIV-positive |            |         |           |            |         |
|-------------------------------------------------|--------------|------------|---------|-----------|------------|---------|--------------|------------|---------|-----------|------------|---------|
|                                                 | Live Births  |            |         | Abortions |            |         | Live Births  |            |         | Abortions |            |         |
|                                                 | cIRR         | 95%CI      | p-value | cIRR      | 95%CI      | p-value | cIRR         | 95%CI      | p-value | cIRR      | 95%CI      | p-value |
| Race/ethnicity (ref: White)                     |              |            |         |           |            |         |              |            |         |           |            |         |
| African American/Black                          | 1.35         | 0.87, 2.09 | 0.0012  | 1.91      | 1.18, 3.09 | 0.0508  | 1.67         | 1.16, 2.42 | 0.0436  | 3.80      | 2.11, 6.84 | <0.0001 |
| Hispanic                                        | 2.06         | 1.32, 3.22 |         | 1.77      | 1.06, 2.94 |         | 1.62         | 1.09, 2.41 |         | 2.76      | 1.48, 5.14 |         |
| Other                                           | 1.16         | 0.56, 2.43 |         | 1.32      | 0.60, 2.92 |         | 1.22         | 0.58, 2.54 |         | 1.49      | 0.48, 4.61 |         |
| Income, annual (ref: >\$24,000)                 |              |            |         |           |            |         |              |            |         |           |            |         |
| ≤\$6,000                                        | 1.05         | 0.74, 1.49 | 0.3531  | 1.19      | 0.83, 1.70 | 0.3224  | 1.29         | 0.93, 1.81 | 0.4003  | 1.53      | 1.03, 2.29 | 0.1028  |
| \$6001-12,000                                   | 1.24         | 0.88, 1.75 |         | 0.89      | 0.60, 1.32 |         | 1.24         | 0.89, 1.73 |         | 1.17      | 0.77, 1.77 |         |
| \$12,001-24,000                                 | 0.89         | 0.60, 1.33 |         | 1.22      | 0.82, 1.80 |         | 1.31         | 0.93, 1.84 |         | 1.50      | 1.00, 2.25 |         |
| Marital status (ref: Married)                   |              |            |         |           |            |         |              |            |         |           |            |         |
| Not married but living with partner             | 1.40         | 0.93, 2.09 | 0.0478  | 1.64      | 1.04, 2.60 | 0.1036  | 1.44         | 1.03, 2.02 | 0.0489  | 1.44      | 0.91, 2.26 | 0.0721  |
| Single (widowed/divorced/separated/other)       | 0.95         | 0.68, 1.32 |         | 1.29      | 0.88, 1.89 |         | 1.05         | 0.79, 1.40 |         | 1.54      | 1.06, 2.22 |         |
| Education completed (ref: ≥High school)         |              |            |         |           |            |         |              |            |         |           |            |         |
| Grade 11 or less                                | 0.64         | 0.50, 0.82 | 0.0004  | 0.73      | 0.56, 0.95 | 0.0183  | 0.74         | 0.60, 0.92 | 0.0075  | 0.88      | 0.67, 1.14 | 0.3239  |
| Employment status (ref: Employed)               |              |            |         |           |            |         |              |            |         |           |            |         |
| Unemployed                                      | 1.36         | 1.05, 1.76 | 0.0202  | 1.60      | 1.21, 2.12 | 0.0009  | 1.25         | 0.97, 1.61 | 0.0825  | 1.46      | 1.06, 1.99 | 0.0189  |
| Insurance status (ref: Insured)                 |              |            |         |           |            |         |              |            |         |           |            |         |
| Uninsured                                       | 0.96         | 0.75, 1.23 | 0.7552  | 0.91      | 0.70, 1.19 | 0.5048  | 1.26         | 0.97, 1.63 | 0.0821  | 1.14      | 0.83, 1.57 | 0.4079  |
| WIHS Site (ref: Chicago)                        |              |            |         |           |            |         |              |            |         |           |            |         |
| Bronx                                           | 0.69         | 0.44, 1.07 | 0.0511  | 2.79      | 1.38, 5.67 | <0.0001 | 0.62         | 0.40, 0.96 | 0.0008  | 1.62      | 0.88, 2.99 | <0.0001 |
| Brooklyn                                        | 0.75         | 0.49, 1.15 |         | 3.72      | 1.87, 7.40 |         | 1.26         | 0.89, 1.79 |         | 3.48      | 2.02, 6.00 |         |
| Washington, D.C.                                | 0.42         | 0.25, 0.72 |         | 1.01      | 0.44, 2.30 |         | 0.96         | 0.64, 1.43 |         | 1.62      | 0.78, 3.01 |         |
| Los Angeles                                     | 0.80         | 0.52, 1.24 |         | 1.70      | 0.81, 3.57 |         | 0.81         | 0.55, 1.20 |         | 1.74      | 0.97, 3.13 |         |
| San Francisco                                   | 0.77         | 0.49, 1.20 |         | 3.12      | 1.54, 6.35 |         | 0.64         | 0.40, 1.02 |         | 0.81      | 0.39, 1.71 |         |
| Number of male sex lifetime partners (ref: 0-4) |              |            |         |           |            |         |              |            |         |           |            |         |
| 5-9                                             | 0.91         | 0.64, 1.31 | 0.5028  | 1.52      | 1.01, 2.27 | 0.1024  | 0.73         | 0.54, 0.99 | 0.0002  | 1.39      | 0.96, 2.02 | 0.0991  |
| 10-24                                           | 0.93         | 0.65, 1.32 |         | 1.42      | 0.94, 2.13 |         | 0.70         | 0.51, 0.96 |         | 1.18      | 0.80, 1.73 |         |
| ≥25                                             | 0.76         | 0.53, 1.09 |         | 1.08      | 0.71, 1.64 |         | 0.50         | 0.37, 0.68 |         | 0.90      | 0.61, 1.32 |         |
| Parity (ref: none)                              |              |            |         |           |            |         |              |            |         |           |            |         |
| 1-2                                             | 1.39         | 0.96, 2.00 | 0.0844  | 2.44      | 1.61, 3.71 | <0.0001 | 1.01         | 0.74, 1.40 | 0.3376  | 1.31      | 0.88, 1.94 | 0.0798  |
| ≥3                                              | 1.57         | 1.05, 2.36 |         | 1.47      | 0.90, 2.42 |         | 1.22         | 0.86, 1.72 |         | 1.60      | 1.05, 2.44 |         |
| Prior abortion (ref: No)                        |              |            |         |           |            |         |              |            |         |           |            |         |
| Yes                                             | 0.60         | 0.46, 0.79 | 0.0002  | 1.34      | 1.03, 1.87 | 0.0293  | 0.82         | 0.65, 1.03 | 0.0857  | 1.59      | 1.19, 2.12 | 0.0015  |

|                                     |      |            |        |      |            |        |      |            |        |      |            |        |
|-------------------------------------|------|------------|--------|------|------------|--------|------|------------|--------|------|------------|--------|
| Previous history of STI (ref: No)   |      |            |        |      |            |        |      |            |        |      |            |        |
| Yes                                 | 1.00 | 0.78, 1.27 | 0.9735 | 1.34 | 1.03, 1.74 | 0.0277 | 0.80 | 0.63, 1.00 | 0.0474 | 0.76 | 0.58, 0.99 | 0.0409 |
| Year of first cART (ref: 2009-2012) |      |            |        |      |            |        |      |            |        |      |            |        |
| 1995-1999                           |      |            |        |      |            |        | 1.04 | 0.58, 1.86 | 0.0005 | 0.54 | 0.31, 0.92 | 0.0015 |
| 2000-2003                           |      |            |        |      |            |        | 1.75 | 0.96, 3.19 |        | 0.94 | 0.53, 1.66 |        |
| 2004-2008                           |      |            |        |      |            |        | 1.22 | 0.62, 2.40 |        | 0.66 | 0.34, 1.31 |        |

cIRR= crude incidence rate ratio; CI = confidence interval; cART=combined antiretroviral therapy; STI= sexually transmitted infection; REF=reference category

**Table 3b: Crude bivariable associations of time-varying covariates with live-birth and abortion rates among HIV-negative and HIV-positive women**

|                                                                                | HIV-negative |            |         |           |            |         | HIV-positive |            |         |           |            |         |
|--------------------------------------------------------------------------------|--------------|------------|---------|-----------|------------|---------|--------------|------------|---------|-----------|------------|---------|
|                                                                                | Live Births  |            |         | Abortions |            |         | Live Births  |            |         | Abortions |            |         |
|                                                                                | cIRR         | 95%CI      | p-value | cIRR      | 95%CI      | p-value | cIRR         | 95%CI      | p-value | cIRR      | 95%CI      | p-value |
| Age, in years (ref: <25)                                                       |              |            |         |           |            |         |              |            |         |           |            |         |
| 25-29                                                                          | 0.65         | 0.46, 0.92 | <0.0001 | 0.57      | 0.41, 0.78 | <0.0001 | 0.84         | 0.56, 1.25 | <0.0001 | 0.46      | 0.30, 0.71 | <0.0001 |
| 30-34                                                                          | 0.60         | 0.42, 0.85 |         | 0.40      | 0.28, 0.56 |         | 0.51         | 0.35, 0.75 |         | 0.34      | 0.23, 0.51 |         |
| ≥35                                                                            | 0.30         | 0.21, 0.43 |         | 0.12      | 0.08, 0.18 |         | 0.18         | 0.12, 0.26 |         | 0.12      | 0.08, 0.18 |         |
| Year of study (ref: 1994-1997)                                                 |              |            |         |           |            |         |              |            |         |           |            |         |
| 1998-2001                                                                      | 0.84         | 0.53, 1.32 | 0.3455  | 1.09      | 0.72, 1.64 | 0.0302  | 1.26         | 0.88, 1.82 | <0.0001 | 0.58      | 0.40, 0.85 | 0.0082  |
| 2002-2005                                                                      | 1.16         | 0.80, 1.68 |         | 0.90      | 0.62, 1.30 |         | 2.07         | 1.50, 2.87 |         | 0.75      | 0.54, 1.05 |         |
| 2006-2012                                                                      | 0.96         | 0.66, 1.39 |         | 0.66      | 0.45, 0.96 |         | 1.58         | 1.12, 2.23 |         | 0.58      | 0.40, 0.84 |         |
| Contraception use in last 6 months (ref: LARC or hormonal)                     |              |            |         |           |            |         |              |            |         |           |            |         |
| None or other                                                                  | 0.76         | 0.56, 1.03 | 0.0772  | 1.19      | 0.87, 1.64 | 0.2740  | 1.10         | 0.85, 1.42 | 0.4645  | 1.27      | 0.91, 1.77 | 0.1652  |
| Condom use in last 6 months (ref: Yes)                                         |              |            |         |           |            |         |              |            |         |           |            |         |
| No                                                                             | 1.51         | 1.18, 1.94 | 0.0013  | 0.35      | 0.24, 0.51 | <0.0001 | 0.56         | 0.44, 0.72 | <0.0001 | 0.14      | 0.09, 0.21 | <0.0001 |
| Currently smoking cigarettes (ref: No)                                         |              |            |         |           |            |         |              |            |         |           |            |         |
| Yes                                                                            | 0.62         | 0.45, 0.84 | 0.0023  | 0.82      | 0.57, 1.19 | 0.2959  | 0.57         | 0.43, 0.74 | <0.0001 | 1.05      | 0.75, 1.46 | 0.7960  |
| Alcohol use*** (ref: 0-7 drinks/week)                                          |              |            |         |           |            |         |              |            |         |           |            |         |
| >7 drinks/week                                                                 | 0.17         | 0.10, 0.30 | <0.0001 | 0.20      | 0.12, 0.32 | <0.0001 | 0.12         | 0.06, 0.21 | <0.0001 | 0.33      | 0.19, 0.56 | <0.0001 |
| Used marijuana/hash*** (ref: No)                                               |              |            |         |           |            |         |              |            |         |           |            |         |
| Yes                                                                            | 0.33         | 0.23, 0.47 | <0.0001 | 0.67      | 0.45, 1.01 | 0.0548  | 0.31         | 0.21, 0.45 | <0.0001 | 0.69      | 0.47, 1.00 | 0.0510  |
| Used uppers (crack/cocaine/methamphetamines) or intravenous drugs*** (ref: No) |              |            |         |           |            |         |              |            |         |           |            |         |
| Yes                                                                            | 0.07         | 0.04, 0.15 | <0.0001 | 0.21      | 0.12, 0.35 | <0.0001 | 0.18         | 0.11, 0.30 | <0.0001 | 0.26      | 0.14, 0.50 | <0.0001 |
| Chronic medical conditions** *** (ref: No)                                     |              |            |         |           |            |         |              |            |         |           |            |         |
| Yes                                                                            | 0.58         | 0.43, 0.80 | 0.0007  | 0.32      | 0.20, 0.52 | <0.0001 | 0.53         | 0.41, 0.68 | <0.0001 | 0.40      | 0.26, 0.60 | <0.0001 |
| cART use *** (ref: No)                                                         |              |            |         |           |            |         |              |            |         |           |            |         |
| Yes                                                                            |              |            |         |           |            |         | 1.69         | 1.32, 2.16 | <0.0001 | 0.61      | 0.44, 0.85 | 0.0034  |
| HIV viral load (log <sub>10</sub> copies/ml) (ref: ≥4)                         |              |            |         |           |            |         |              |            |         |           |            |         |
| <4                                                                             |              |            |         |           |            |         | 2.90         | 2.17, 3.87 | <0.0001 | 1.43      | 1.03, 1.98 | 0.0312  |
| CD4+ T-cell count (cells/mm <sup>3</sup> ) (ref: ≥350)                         |              |            |         |           |            |         |              |            |         |           |            |         |
| <350                                                                           |              |            |         |           |            |         | 0.37         | 0.28, 0.50 | <0.0001 | 0.55      | 0.40, 0.76 | 0.0002  |

cIRR= crude incidence rate ratio; ART=combined antiretroviral therapy; LARC=Long-acting reversible contraceptive; REF=reference category

\* Age at pregnancy outcome or age at visit if no pregnancy outcome reported;

\*\*Includes stroke, MI, diabetes, hypertension, DVT PE, Cancer, TB.

\*\*\* Calculated as occurring since last visit
